# Supplementary material for: Using Recombinant Proteins from Lutzomyia longipalpis Saliva to Estimate Human Vector Exposure in Visceral Leishmaniasis Endemic Areas
Source: PLOS journal article supplement (doi:10.1371/journal.pntd.0000649), 2010-03-22

Recombinant proteins to estimate exposure to sand fly saliva  
Flow chart of the third phase (validation)

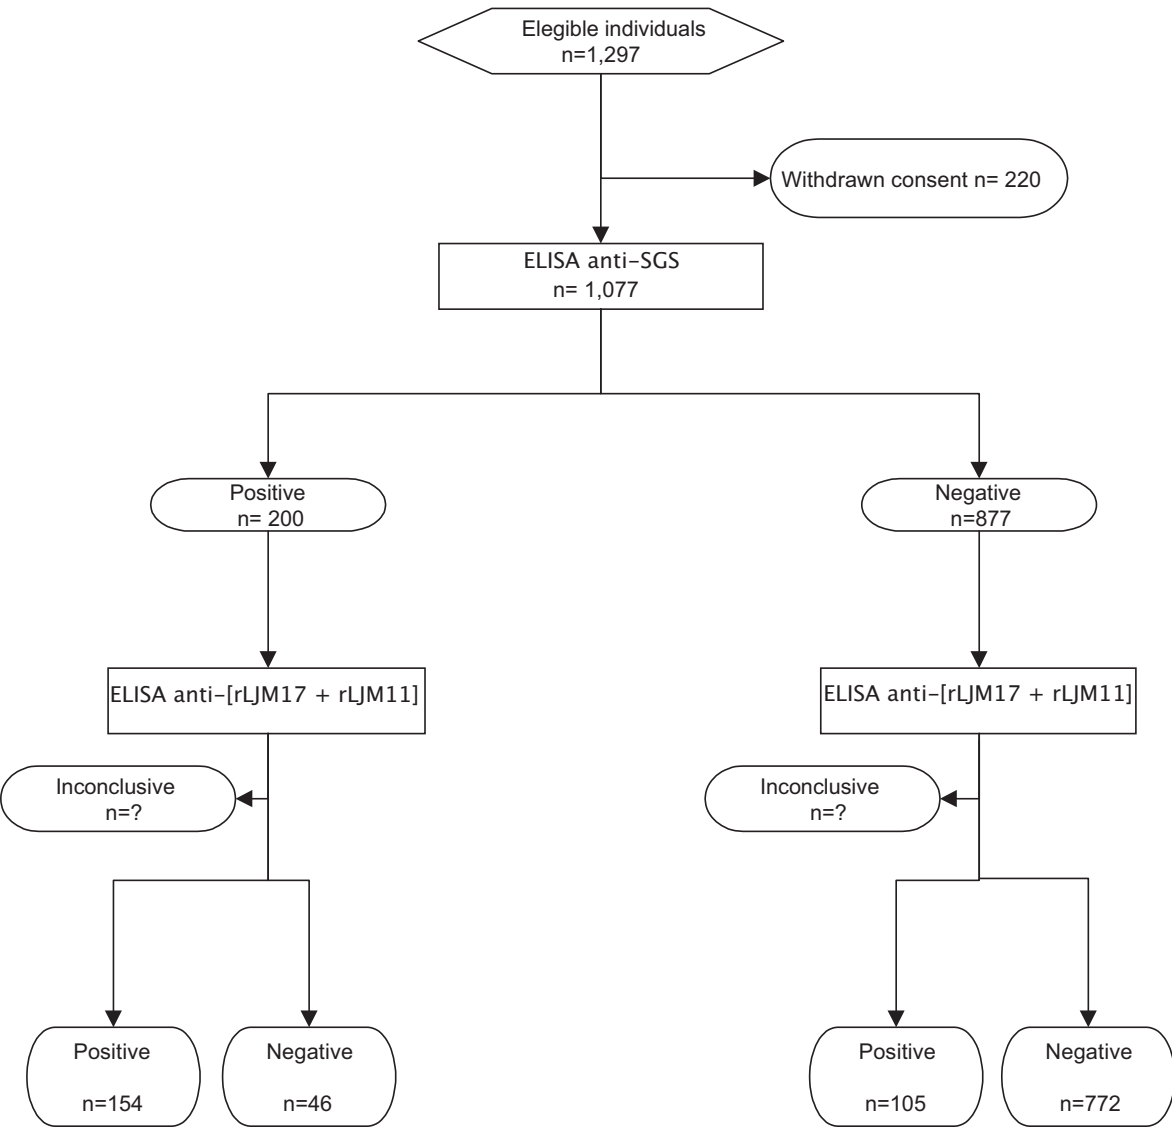

Supplement: S2 (10.1371/journal.pntd.0000649.s002) [file journal.pntd.0000649.s002]
